# Supplementary material
Source: Frontiers journal article supplement (https://www.frontiersin.org/articles/454144)
Supplement: Table_2.pdf [file Table_2.pdf]

Table S2. *Predictive accuracy. Models are listed in decreasing order of predictive accuracy, as assessed by Pareto-smoothed leave one out cross-validation, and expressed in differences in expected posterior log-likelihood. SE, standard error.*

| Model # | Difference | SE  |
|---------|------------|-----|
| 5       | 0.0        | 0.0 |
| 4       | -0.7       | 1.2 |
| 6       | -0.7       | 0.2 |
| 7       | -1.0       | 0.3 |
| 1       | -3.8       | 3.9 |
| 2       | -6.7       | 3.9 |
| 3       | -7.7       | 3.8 |
